# Supplementary material for: Randomized controlled trial of hydrolyzed fish diets in dogs with chronic enteropathy
Source: PubMed Central journal article supplement — J Vet Intern Med. 2023 Sep 7;37(6):2334–43. doi: 10.1111/jvim.16844 (PMC10658534; doi:10.1111/jvim.16844), 2023-09-07
Supplement: JVIM-37-2334-s001.pdf [file JVIM-37-2334-s001.pdf]

Week 0: 2.2kg, albumin 1.6g/dL, CCECAI 12, Stool 4

Week 12: 3.6kg, albumin 3.6g/dL, CCECAI 0, Stool 2

A

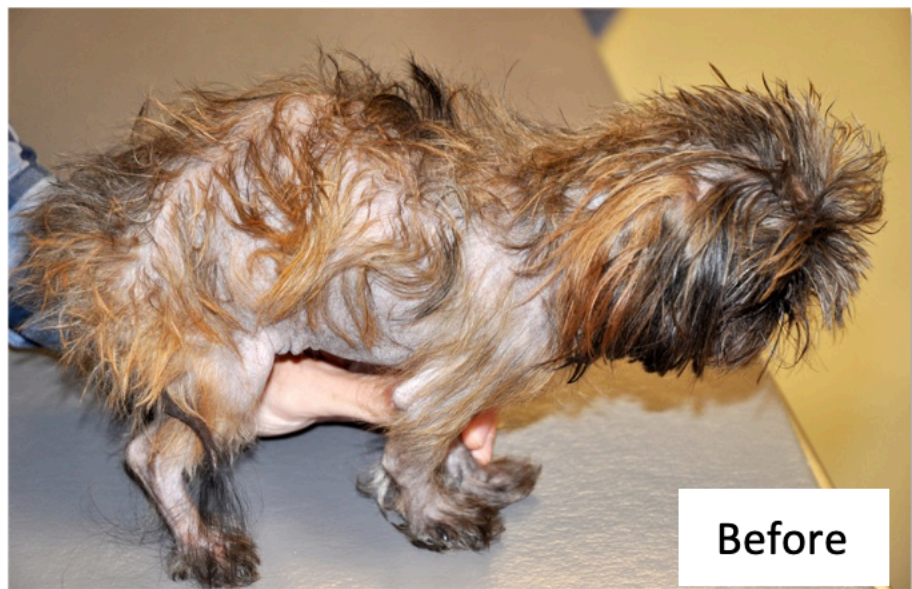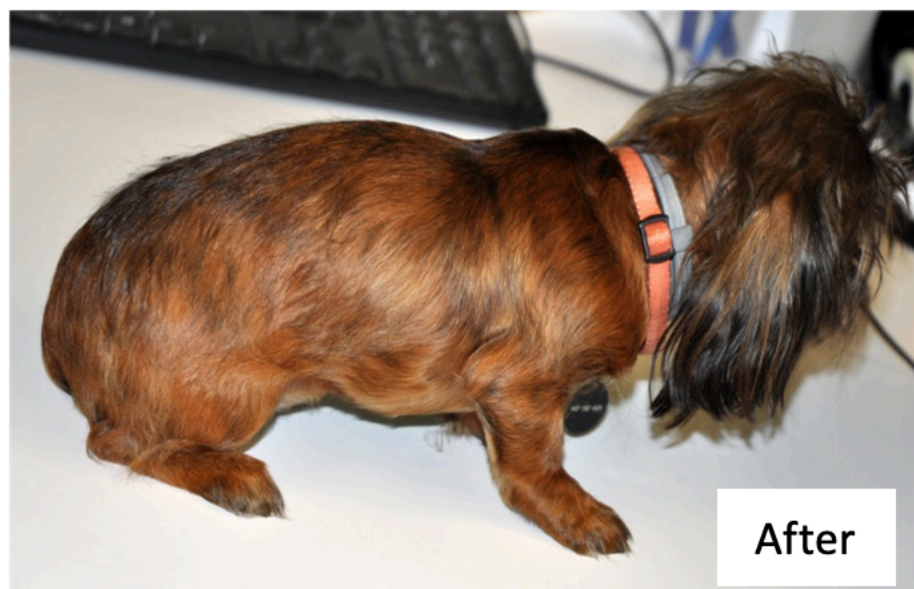

B

| DIET |     | CCECAI |     |      |      | FECAL SCORE |     |      |      | Albumin |      | Cholesterol |      | Cobalamin |      | Weight (kg) |      |
|------|-----|--------|-----|------|------|-------------|-----|------|------|---------|------|-------------|------|-----------|------|-------------|------|
|      |     | 0      | 6wk | 12wk | 26wk | 0           | 6wk | 12wk | 26wk | 0wk     | 12wk | 0           | 12wk | 0         | 12wk | 0           | 12wk |
| HF   | # 4 | 9      | 0   | 0    | 0    | 5           | 2.5 | 2.5  | 2.5  | 2.4     | 2.6  | 118         | 191  | 275       | 580  | 28.4        | 35.4 |
| HF+  | # 7 | 8      | 2   | 0    | 0    | 4           | 3   | 2    | 2    | 2.9     | 3.6  | 101         | 175  | 149       | 1512 | 24.4        | 31.2 |

C

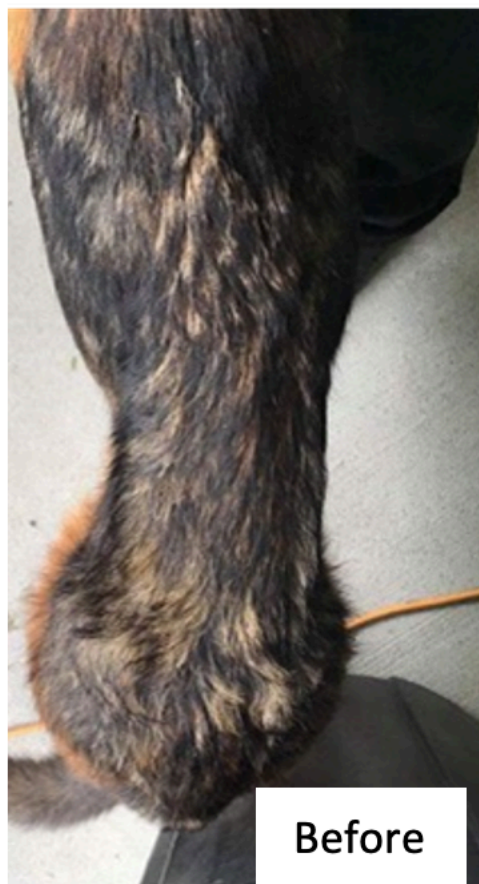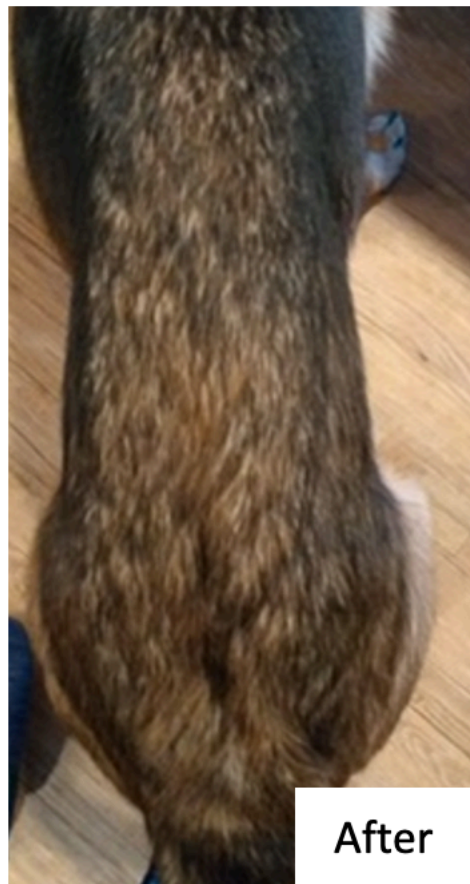

**Supplemental Figure 1: Clinical responses to dietary modification**

A. Coat and body condition of a dog with PLE (#2) before and after dietary modification (HF), prednisolone, tylosin and parenteral cobalamin.

B. Clinical and biochemical parameters of 2 dogs with PLE (#4 HF, #7 HF+) with long term remission on diet alone.

C. Coat and body condition of a dog with PLE (#7) before and after dietary modification (HF+).
