# Supplementary material for: Randomized controlled trial of hydrolyzed fish diets in dogs with chronic enteropathy
Source: PubMed Central journal article supplement — J Vet Intern Med. 2023 Sep 7;37(6):2334–43. doi: 10.1111/jvim.16844 (PMC10658534; doi:10.1111/jvim.16844), 2023-09-07
Supplement: JVIM-37-2334-s002.pdf [file JVIM-37-2334-s002.pdf]

| Patient | Pre-Trial Diets                                                     | Contained Fish | Initial trial diet | Final trial diet | Psyllium                  | Concurrent Medications                                                                        |                                                                                             |                                                                                            | Response Phenotype | Comments                                                                                                                                                                     |
|---------|---------------------------------------------------------------------|----------------|--------------------|------------------|---------------------------|-----------------------------------------------------------------------------------------------|---------------------------------------------------------------------------------------------|--------------------------------------------------------------------------------------------|--------------------|------------------------------------------------------------------------------------------------------------------------------------------------------------------------------|
|         |                                                                     |                |                    |                  |                           | Baseline                                                                                      | week 12                                                                                     | 6 months                                                                                   |                    |                                                                                                                                                                              |
| 1       | Home Cooked, Royal Canin PW                                         | yes            | HF                 | HF               | from wk 0, 2 tsp/meal     | Dexamethasone 0.16 mg/kg SID ; Cobalamin 1000 mcg /week                                       | Dexamethasone 0.12 mg/kg SID ; Cobalamin 1000 mcg /week,                                    | Dexamethasone 0.05 mg/kg EOD; Cobalamin 1500 mcg /week                                     | IR                 | Pre-referral failed Cyclosporine (5mg/kg PO SID) and Mycophenolate (10mg/kg PO B-SID). Diet trial + Dexamethasone initiated concurrently at Baseline.                        |
| 2       | Purina EN, Home Cooked                                              | no             | HF                 | HF               | no                        | Prednisone, 1.73 mg/kg ; Cobalamin 250 mcg /week                                              | Prednisolone 1.5mg/kg; Tylosin 15mg/kg PO BID; Cobalamin 250 mcg /week                      | Prednisolone 1.5mg/kg; Tylosin 15mg/kg PO SID; Cobalamin 250 mcg /week                     | IR / IAR           | Diet trial + Prednisone initiated concurrently at Baseline. Tylosin was added at week 2 due to partial response.                                                             |
| 3       | Hill's i/d                                                          | no             | HF                 | HF               | intermittent              | Dexamethasone 0.11 mg/kg SID ; Cobalamin 250 mcg q 2 wks                                      | Dexamethasone 0.09 mg/kg q 3days                                                            | Dexamethasone 0.05mg/kg q 3days                                                            | IR                 | Diet trial + Dexamethasone initiated concurrently at Baseline.                                                                                                               |
| 4       | Fresh Pet Moist Roll                                                | yes            | HF                 | HF               | from wk 6, 1 tsp / meal   | no medications                                                                                | no medications                                                                              | no medications                                                                             | FR                 |                                                                                                                                                                              |
| 5       | Purina HA, Home Cooked, Nutrisource                                 | yes            | HF                 | HF               | no                        | Dexamethasone 0.1 mg/kg SID; Clopidogrel 4mg SID; Cobalamin 250 mcg /week; Zonisamide25mg BID | Prednisolone 0.2mg/kg SID; Clopidogrel 4mg SID; Cobalamin 250 mcg /week; Zonisamide25mg BID | Prednisolone 0.2mg/kg EOD; Clopidogrel 4mg SID; Cobalamin 250 mcg/week; Zonisamide25mg BID | IR                 | On Zonisamide prior to diet trial. Diet trial + Dexamethasone and Clopidogrel initiated concurrently at Baseline.                                                            |
| 6       | Purina EN, Purina HA, Home Cooked                                   | no             | HF+                | HF               | No                        | Dexamethasone 0.1 mg/kg SID Cobalamin 400mcg SQ /week                                         | Cobalamin 400mcg SQ/week                                                                    | Cobalamin 400mcg SQ/week                                                                   | FR / IR            | Diet trial + Dexamethasone initiated concurrently at Baseline. Required Prednisolone at 18 months for recurrence of hypoproteinemia that induced clinical remission.         |
| 7       | Hill's z/d, Purina ProPlan Sport Salmon Rice, Purina Chicken & Rice | yes            | HF+                | HF+              | no                        | Doxycycline 5.6 mg/kg BID; Cobalamin 800mcg SQ /week                                          | no medications                                                                              | no medications                                                                             | FA / FR            | Pre-referral failed Probiotics, Metronidazole, Tylosin, Prednisone + Azathioprine and Anthelmintic. On Doxycycline at start of diet trial. Remission > 1 year on diet alone. |
| 8       | Royal Canin High Energy GI Diet                                     | no             | HF+                | HF               | from week 3, 1/2 tsp/meal | Tylosin 12mg/kg PO BID                                                                        | failed wk 8: not eating diet                                                                | failed wk 8: not eating diet                                                               | NR                 | On Tylosin at start of diet trial.                                                                                                                                           |

**Supplemental Table 2: Pre-trial diets, concurrent medications and clinical outcome of dogs with protein losing enteropathy**

Response Phenotype: IR= immunosuppression responsive, IAR = immunosuppression + antibiotic responsive, NR= non-responsive, FR = food responsive, FA= food and antibiotic responsive
