# Supplementary material for: Randomized controlled trial of hydrolyzed fish diets in dogs with chronic enteropathy
Source: PubMed Central journal article supplement — J Vet Intern Med. 2023 Sep 7;37(6):2334–43. doi: 10.1111/jvim.16844 (PMC10658534; doi:10.1111/jvim.16844), 2023-09-07
Supplement: JVIM-37-2334-s003.pdf [file JVIM-37-2334-s003.pdf]

| Patient ID | Pre-Trial Diets                                                                                                                                                                                                                                                         | corn | chicken | fish | Initial trial diet | Final trial diet | psyllium    |
|------------|-------------------------------------------------------------------------------------------------------------------------------------------------------------------------------------------------------------------------------------------------------------------------|------|---------|------|--------------------|------------------|-------------|
| 7          | Royal Canin HP, Royal Canin GI low fat, Royal Canin High Energy GI diet                                                                                                                                                                                                 | X    | X       |      | CONTROL            | CONTROL          |             |
| 10         | Purina chicken & rice, Purina HA hydrolyzed chicken flavor                                                                                                                                                                                                              |      | X       |      | CONTROL            | CONTROL          |             |
| 14         | Home cooked, Fresh Pet Vital Salmon and White Fish, Royal Canin Ultamino, Acana Lamb & Apple, Royal Canin GI Low Fat                                                                                                                                                    |      | X       | X    | CONTROL            | HF+              | YES, week 3 |
| 15         | Home cooked                                                                                                                                                                                                                                                             |      | X       | X    | CONTROL            | CONTROL          | YES, week 2 |
| 16         | Science Diet Maintenance                                                                                                                                                                                                                                                | X    | X       |      | CONTROL            | CONTROL          |             |
| 18         | Purina EN, Gastroenteric Fiber Balance                                                                                                                                                                                                                                  | X    | X       |      | CONTROL            | CONTROL          |             |
| 21         | Purina Adult Sensitive Skin & Stomach Salmon & Rice                                                                                                                                                                                                                     |      |         | X    | CONTROL            | CONTROL          |             |
| 2          | Purina EN, Home Cooked, Nutrisource, Fresh Pet Moist Roll                                                                                                                                                                                                               |      | X       | X    | HF                 | HF               |             |
| 5          | Blue Buffalo Lamb & Oatmeal, Pedigree Chopped Dinner                                                                                                                                                                                                                    |      | X       |      | HF                 | HF               |             |
| 8          | Purina Chicken & Rice                                                                                                                                                                                                                                                   |      | X       |      | HF                 | HF               |             |
| 11         | Purina HA hydrolyzed chicken flavor                                                                                                                                                                                                                                     |      |         |      | HF                 | HF               |             |
| 12         | Home Cooked                                                                                                                                                                                                                                                             |      | X       |      | HF                 | HF               |             |
| 19         | Hill's z/d                                                                                                                                                                                                                                                              |      |         |      | HF                 | HF               |             |
| 22         | Purina EN                                                                                                                                                                                                                                                               | X    | X       |      | HF                 | HF               |             |
| 1          | Purina HA hydrolyzed chicken flavor, Hill's z/d                                                                                                                                                                                                                         |      | X       | X    | HF+                | HF               |             |
| 3          | Purina Adult Sensitive Skin & Stomach Salmon & Rice                                                                                                                                                                                                                     |      | X       | X    | HF+                | HF               |             |
| 4          | Purina Chicken & Rice, Home Cooked                                                                                                                                                                                                                                      |      | X       |      | HF+                | HF+              |             |
| 6          | Home Cooked, Holistic select kibble, Purina Naturals dry                                                                                                                                                                                                                | X    | X       | X    | HF+                | HF+              | YES, week 3 |
| 9          | Royal Canin HP, Honest Kitchen Fish                                                                                                                                                                                                                                     |      |         | X    | HF+                | HF               | YES, week 2 |
| 13         | Science Diet Maintenance, Simply Nourish Salmon & Sweet Potato, 4 Health Grain Free, Royal Canin HP                                                                                                                                                                     | X    | X       | X    | HF+                | HF+              |             |
| 17         | Fromm 4 Star Nutritional Salmon                                                                                                                                                                                                                                         |      |         | X    | HF+                | HF+              |             |
| 20         | Purina EN, Home Cooked, Purina HA hydrolyzed chicken flavor, 4 Health Grain Free, PurinaOne Smart Blends Sensitive Systems, Royal Canin Medium Sensitive Digestive Care, Zignature Kangaroo, Royal Canin Selected Protein Potato and White Fish, Royal Canin Low Fat GI | X    | X       | X    | HF+                | HF+              |             |
| 24         | Purina Naturals dry, Purina Beneful                                                                                                                                                                                                                                     | X    | X       |      | HF+                | HF+              |             |

**Supplemental Table 1: Pre-trial diets in dogs with non-protein losing enteropathy**
